# Supplementary material for: Investigation of the Removal of Several Micropollutants Presenting Different Ozone Reactivities from Natural Potable Water Matrix by the Application of Ozonation with the Use of SiO2 and Al2O3 as Catalysts
Source: MDPI journal article supplement (doi:10.3390/separations9070173), 2022-07-12
Supplement: s1 [file s1]

## **Supporting Information**

### **Removal of micropollutants with different physicochemical properties from natural potable water by heterogeneous catalytic ozonation**

Savvina Psaltou<sup>1</sup>, Efthimia Kaprara<sup>2</sup>, Apostolos Tsaragklis<sup>2</sup>, Manassis Mitrakas<sup>2</sup>, and  
Anastasios Zouboulis<sup>1,\*</sup>

<sup>1</sup>Laboratory of Chemical and Environmental Technology, Department of Chemistry, Aristotle University, Thessaloniki, Greece; psaltousavvina@gmail.com; zoubouli@chem.auth.gr

<sup>2</sup>Laboratory of Analytical Chemistry, Department of Chemical Engineering, Aristotle University, Thessaloniki, Greece; kaprara@auth.gr; atsaragkl@gmail.com; mmitraka@auth.gr

\*Correspondence: zoubouli@chem.auth.gr

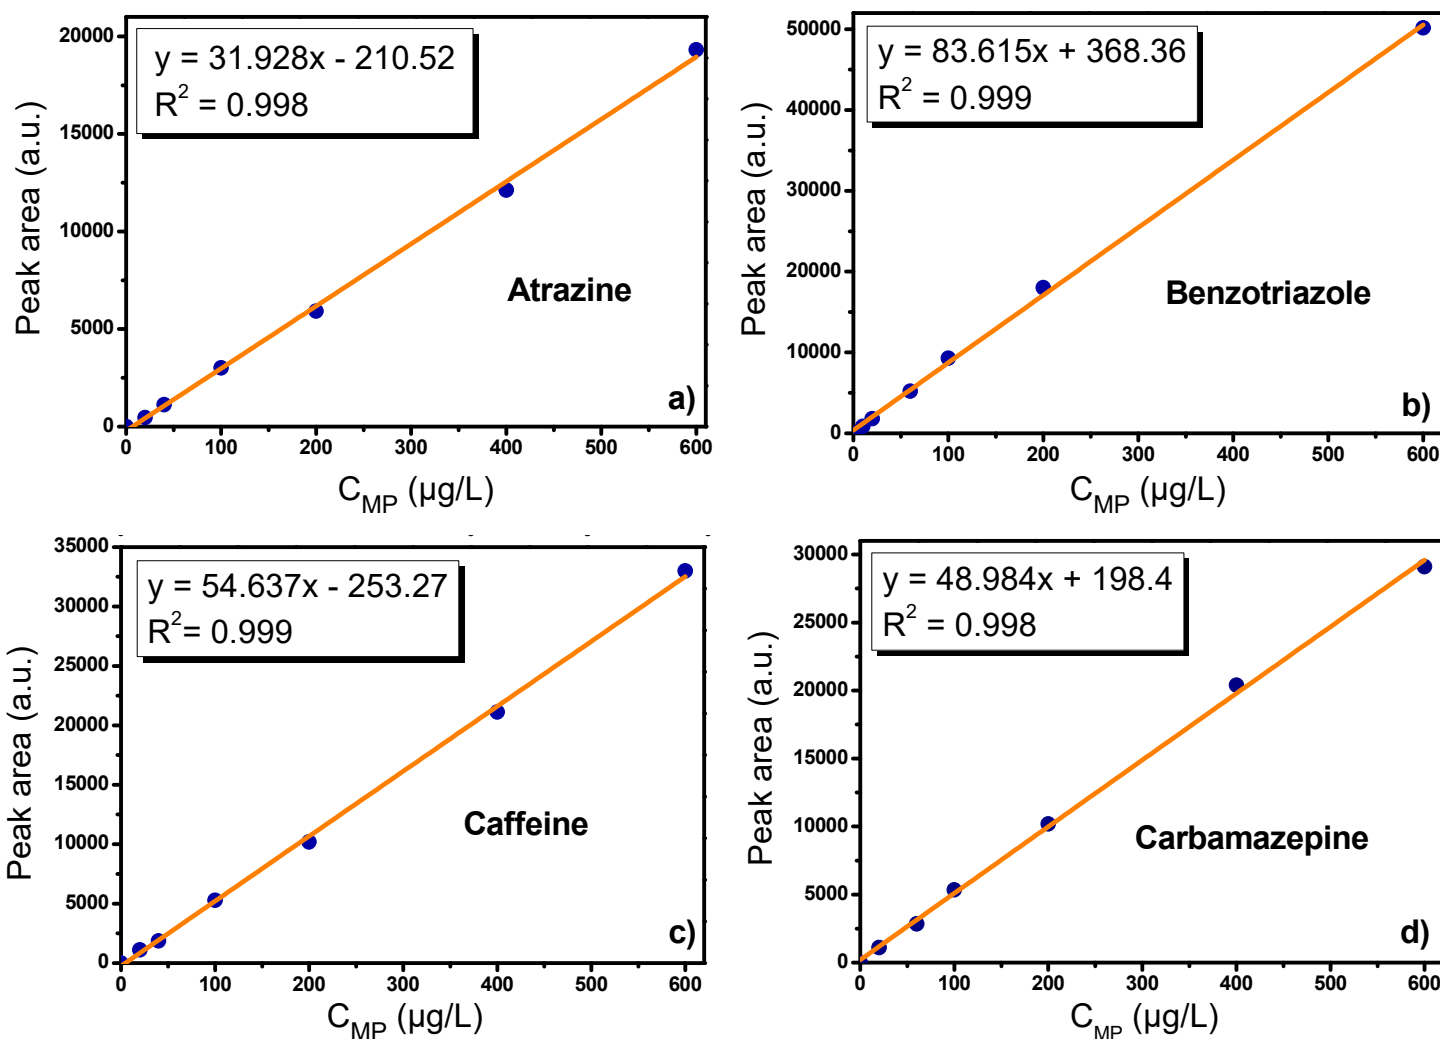

**Figure S1.** Linear calibration curve for the determination of (a) atrazine, (b) benzotriazole, (c) caffeine, (d) carbamazepine, (e) fluoxetine, (f) ibuprofen, (g) paracetamol and (h) p-CBA in the concentration range of 0-600  $\mu\text{g/L}$ .

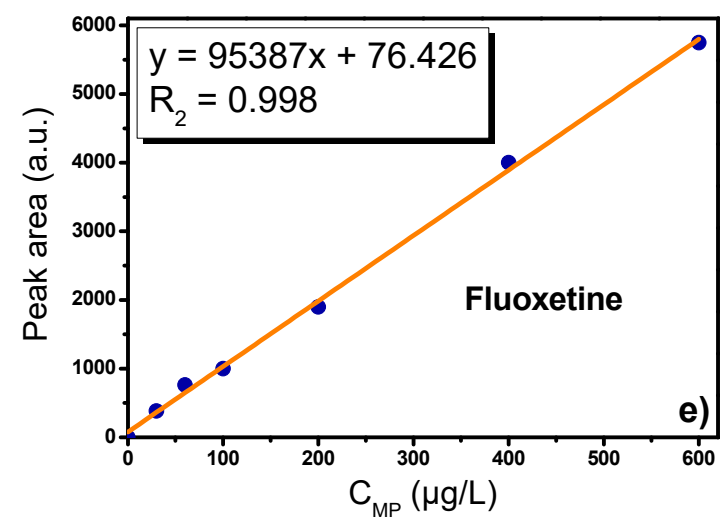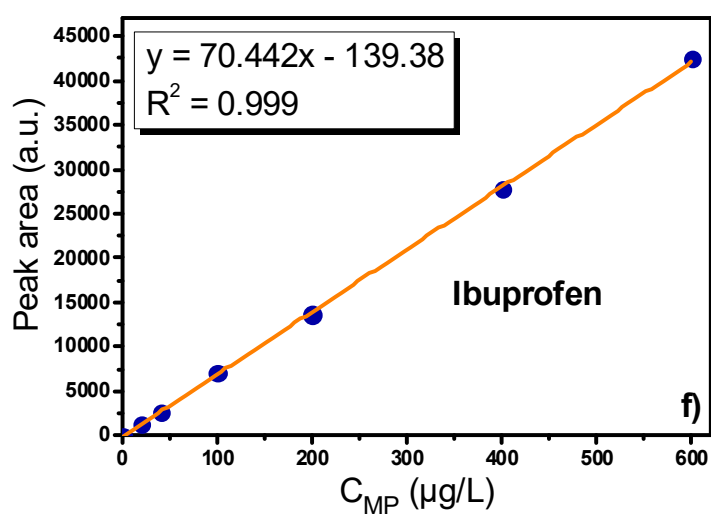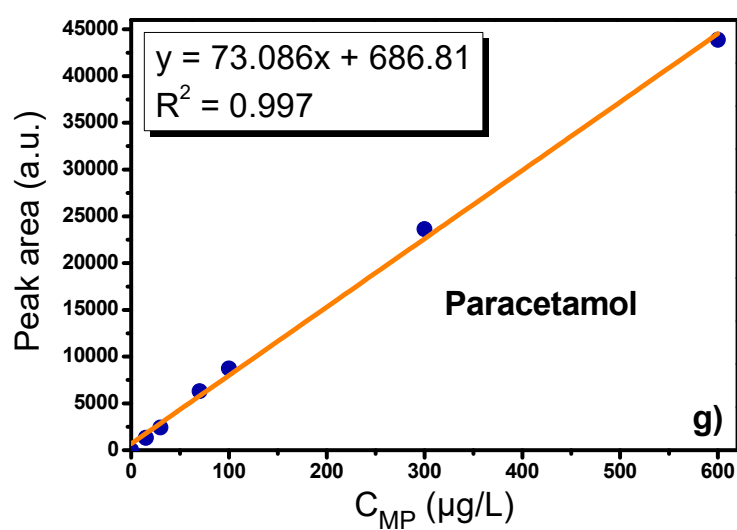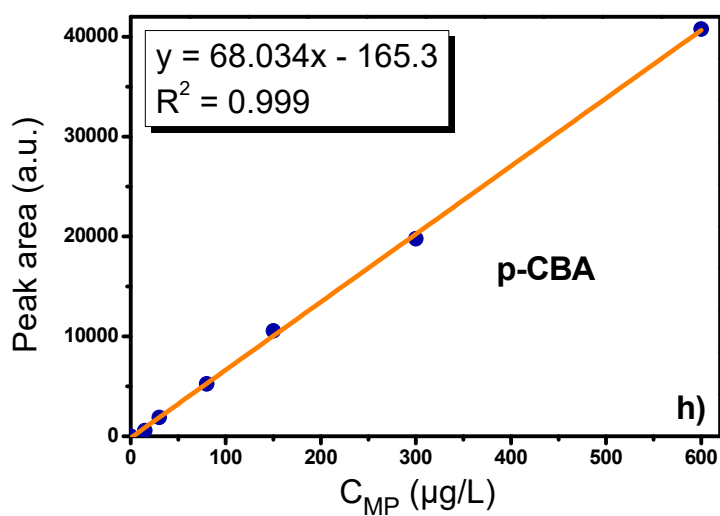

Figure S1 (continuous).

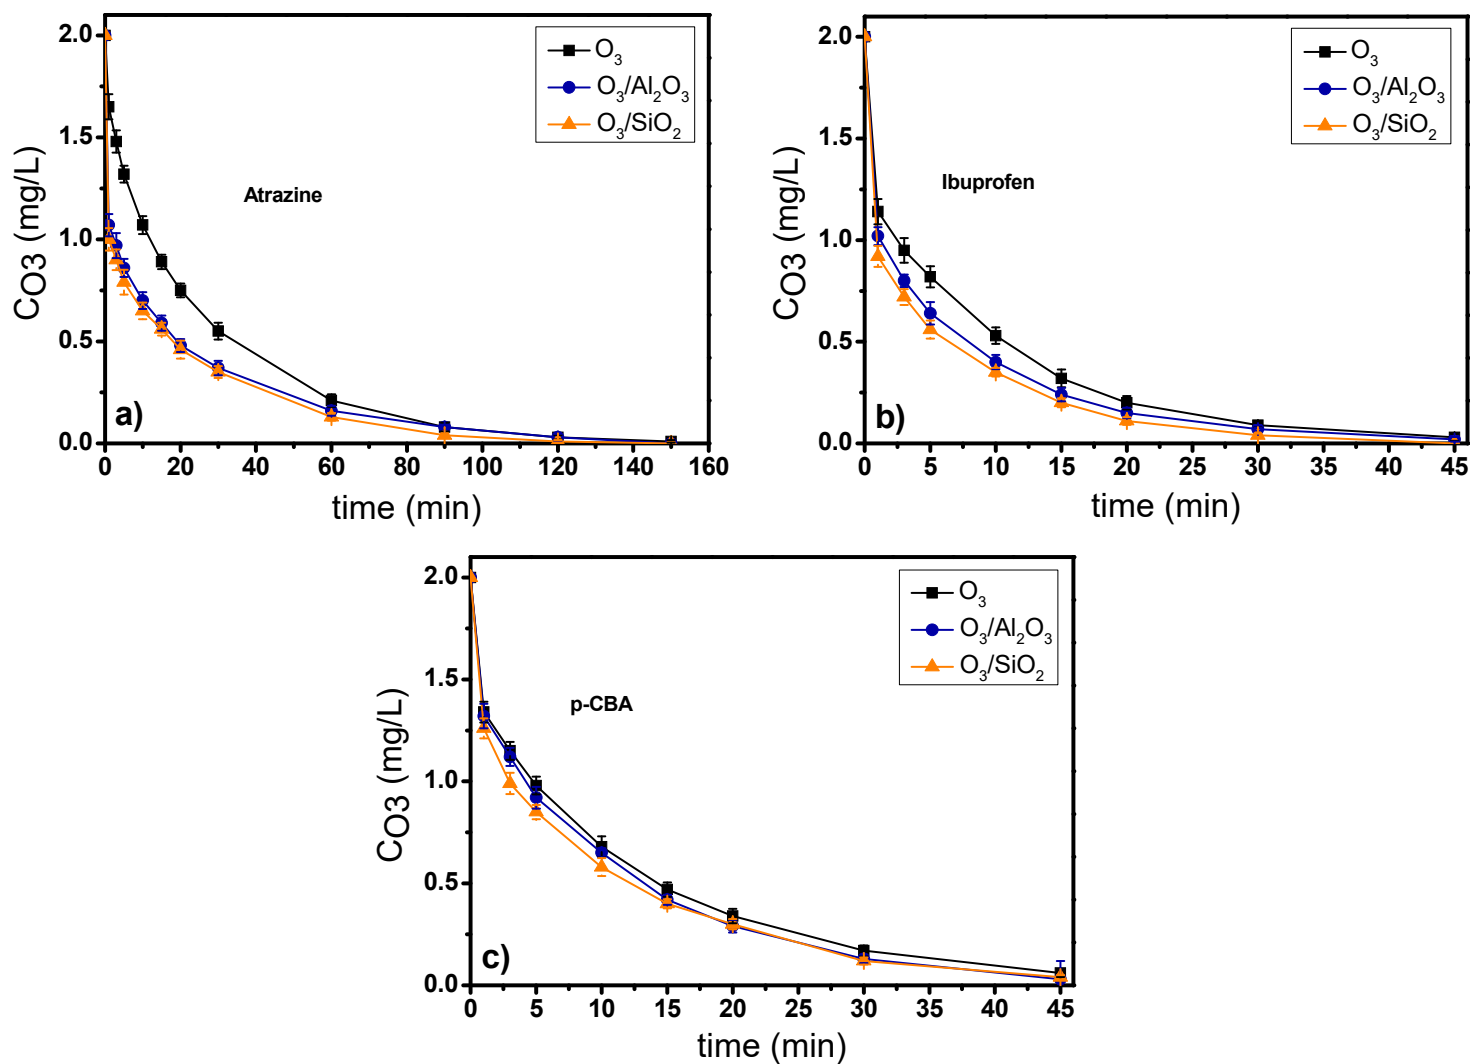

**Figure S2.** Ozone decomposition during catalytic ozonation of (a) atrazine, (b) ibuprofen and (c) p-CBA with the use of  $\text{Al}_2\text{O}_3$  and  $\text{SiO}_2$  as catalysts compared to single ozonation in natural potable water. Experimental conditions:  $C_{\text{MP}}$  500  $\mu\text{g/L}$ ,  $C_{\text{cat}}$  0.5 g/L,  $\text{CO}_3$  2 mg/L, pH 7.8,  $T$   $23 \pm 2^\circ\text{C}$ .

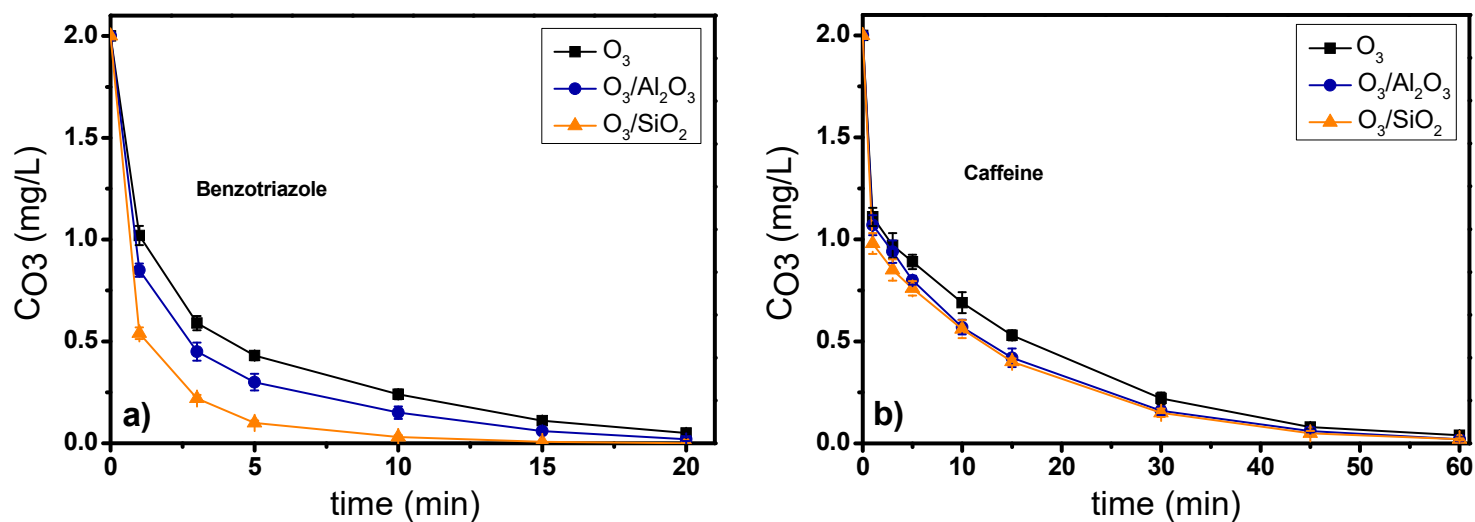

**Figure S3.** Ozone decomposition during catalytic ozonation of (a) benzotriazole, and (b) caffeine with the use of  $Al_2O_3$  and  $SiO_2$  as catalysts compared to single ozonation in natural potable water. Experimental conditions:  $C_{MP}$ . 500  $\mu g/L$ ,  $C_{cat}$ . 0.5 g/L,  $CO_3$  2 mg/L, pH 7.8, T  $23 \pm 2^\circ C$ .

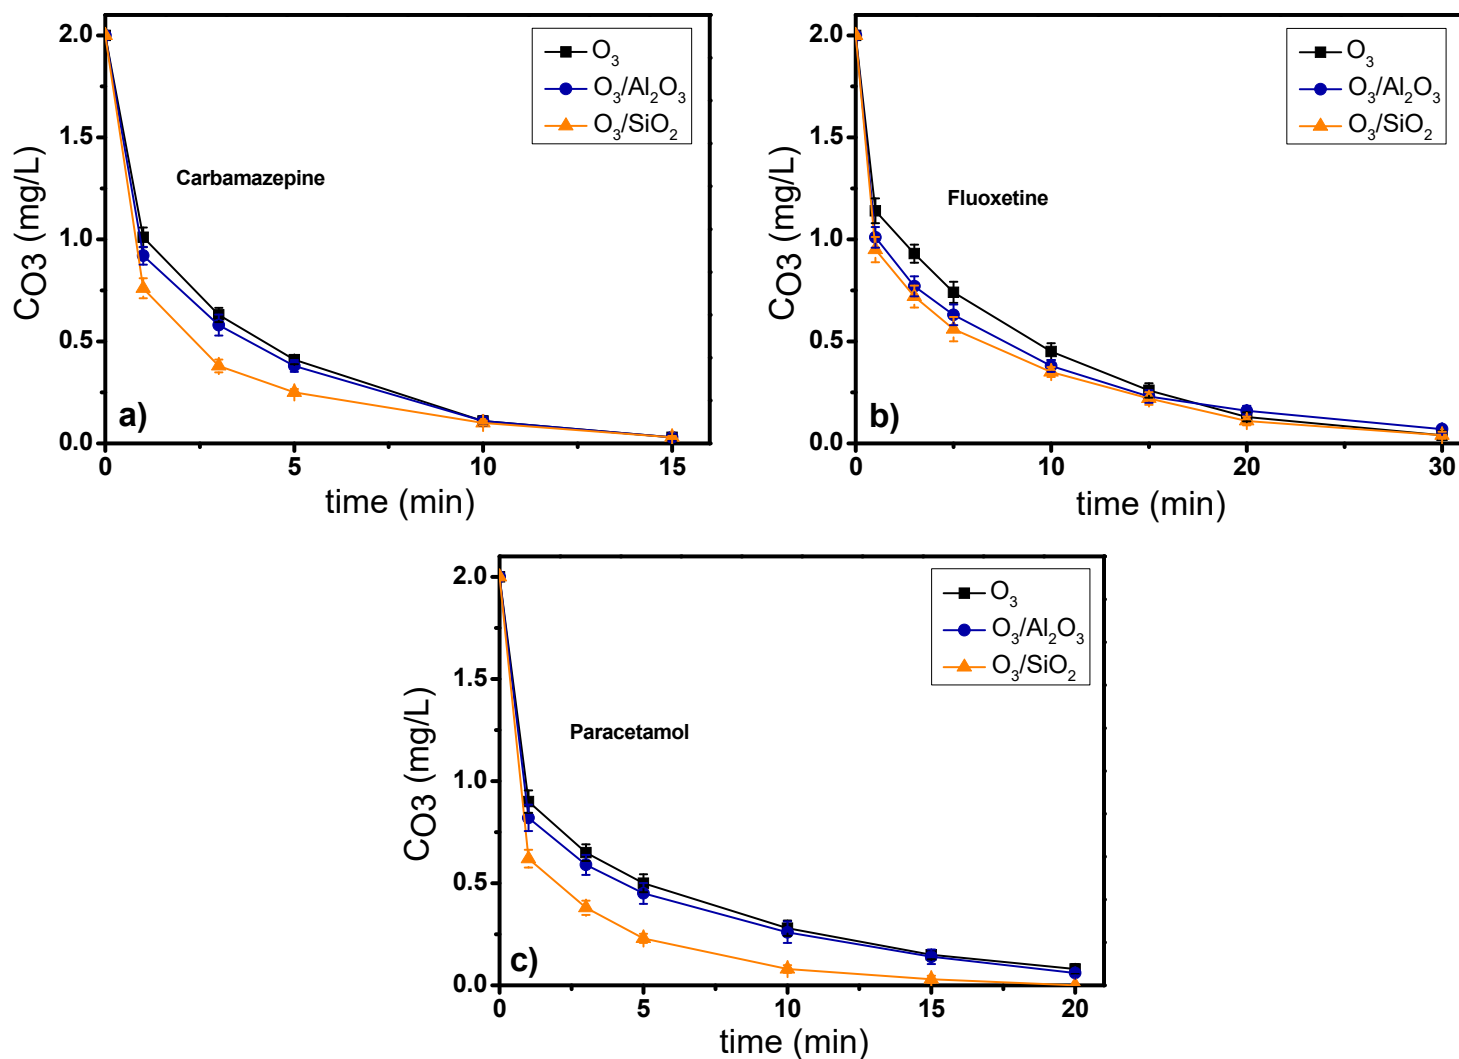

**Figure S4.** Ozone decomposition during catalytic ozonation of (a) carbamazepine, (b) fluoxetine and (c) paracetamol with the use of  $\text{Al}_2\text{O}_3$  and  $\text{SiO}_2$  as catalysts compared to single ozonation in natural potable water. Experimental conditions:  $C_{\text{MP}}$  500  $\mu\text{g/L}$ ,  $C_{\text{cat}}$  0.5 g/L,  $\text{CO}_3$  2 mg/L, pH 7.8, T  $23 \pm 2^\circ \text{C}$ .

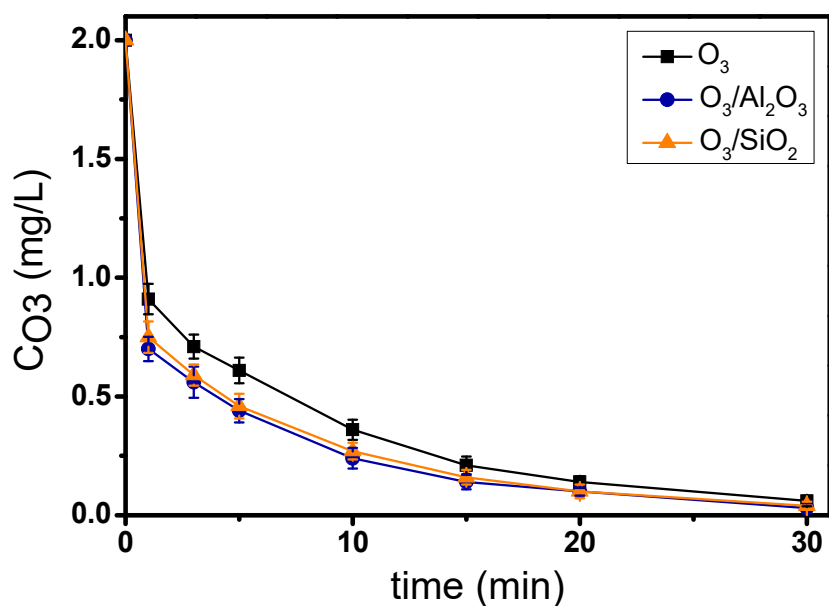

**Figure S5.** Ozone decomposition during catalytic ozonation of the mixture of the 8 examined micropollutants with the use of Al<sub>2</sub>O<sub>3</sub> and SiO<sub>2</sub> as catalysts compared to single ozonation in natural potable water. Experimental conditions: C<sub>MP</sub>. 50 µg/L, C<sub>cat</sub>. 0.5 g/L, C<sub>O<sub>3</sub></sub> 2 mg/L, pH 7.8, T 23±2° C.

**Table S1.** HPLC measurement parameters for the determination of the concentration of the examined 8 micropollutants.

| Micropollutant              | % Solvent ratio              |                     | Sample amount<br>(µL) | Flow<br>(mL/min) | Absorption<br>(nm) |
|-----------------------------|------------------------------|---------------------|-----------------------|------------------|--------------------|
|                             | <i>10 mM phosphoric acid</i> | <i>Acetonitrile</i> |                       |                  |                    |
| <b>Atrazine</b>             | 50                           | 50                  | 25                    | 0.8              | 254                |
| <b>Benzotriazole</b>        | 75                           | 25                  | 25                    | 0.8              | 254                |
| <b>Ibuprofen</b>            | 40                           | 60                  | 10                    | 1.1              | 220                |
| <b>Carbamazepine</b>        | 60                           | 40                  | 25                    | 0.8              | 254                |
| <b>p-chlorobenzoic acid</b> | 60                           | 40                  | 25                    | 0.8              | 254                |
| <b>Fluoxetine</b>           | 62                           | 38                  | 50                    | 1.0              | 214                |
|                             | <i>Water</i>                 | <i>Methanol</i>     |                       |                  |                    |
| <b>Caffeine</b>             | 75                           | 25                  | 20                    | 1.0              | 275                |
| <b>Paracetamol</b>          | 90                           | 10                  | 25                    | 1.0              | 243                |

**Table S2.** 1<sup>st</sup> order reaction rate constants of ozone decomposition during catalytic ozonation with the use of SiO<sub>2</sub> and Al<sub>2</sub>O<sub>3</sub> as catalysts for ozone concentration 2 mg/L in experiments with one probe compound.

| Micropollutant | O <sub>3</sub>         |                     |                | O <sub>3</sub> /SiO <sub>2</sub> |                     |                | O <sub>3</sub> /Al <sub>2</sub> O <sub>3</sub> |                     |                |
|----------------|------------------------|---------------------|----------------|----------------------------------|---------------------|----------------|------------------------------------------------|---------------------|----------------|
|                | k (min <sup>-1</sup> ) | Equations           | R <sup>2</sup> | k (min <sup>-1</sup> )           | Equations           | R <sup>2</sup> | k (min <sup>-1</sup> )                         | Equations           | R <sup>2</sup> |
| Atrazine       | 0.033                  | y = -0.033x – 0.252 | 0.999          | 0.037                            | y = -0.037x – 0.685 | 0.991          | 0.038                                          | y = -0.038x – 0.753 | 0.996          |
| Benzotriazole  | 0.150                  | y = -0.150x – 0.669 | 0.992          | 0.308                            | y = -0.308x – 1.208 | 0.991          | 0.186                                          | y = -0.186x – 0.819 | 0.990          |
| Caffeine       | 0.058                  | y = -0.058x – 0.514 | 0.997          | 0.067                            | y = -0.067x – 0.632 | 0.999          | 0.066                                          | y = -0.067x – 0.563 | 0.999          |
| Carbamazepine  | 0.220                  | y = -0.220x – 0.507 | 0.991          | 0.226                            | y = -0.226x – 0.843 | 0.999          | 0.245                                          | y = -0.245x – 0.491 | 0.995          |
| Fluoxetine     | 0.102                  | y = -0.102x – 0.470 | 0.999          | 0.108                            | y = -0.108x – 0.675 | 0.999          | 0.103                                          | y = -0.103x – 0.625 | 0.999          |
| Ibuprofen      | 0.084                  | y = -0.084x – 0.516 | 0.992          | 0.084                            | y = -0.084x – 0.950 | 0.991          | 0.185                                          | y = -0.088x – 0.718 | 0.990          |
| p-CBA          | 0.070                  | y = -0.070x – 0.361 | 0.999          | 0.078                            | y = -0.078x – 0.431 | 0.999          | 0.079                                          | y = -0.079x – 0.351 | 0.998          |
| Paracetamol    | 0.125                  | y = -0.125x – 0.723 | 0.998          | 0.215                            | y = -0.215x – 1.018 | 0.994          | 0.131                                          | y = -0.132x – 0.781 | 0.997          |
